# Supplementary material for: Study on Adsorption Characteristics and Sensing Performance of Zr-MOF-808@GO for SF6 Discharge Decomposition Gas
Source: Research Square preprint supplement (doi:10.21203/rs.3.rs-8226201/v1), 2025-12-03
Supplement: Supplementary file 1 [file 56bfee96fea66f09c6e8531c.docx]

*Supplementary Information for*

Study on Adsorption Characteristics and Sensing Performance of Zr-MOF-808@GO for SF6 Discharge Decomposition Gas

Tianxiang Lei1,*, Ying Xu1, Zhiyuan Hao1, Tierui Zou1, Zijian Gao1, Ling Wang1, Yuqi Zhao1

*1 State Grid Economic And Technological Research Institute Co,.LTD, CHINA*

** Correspondence: [narroson@126.com](mailto:narroson@126.com)*


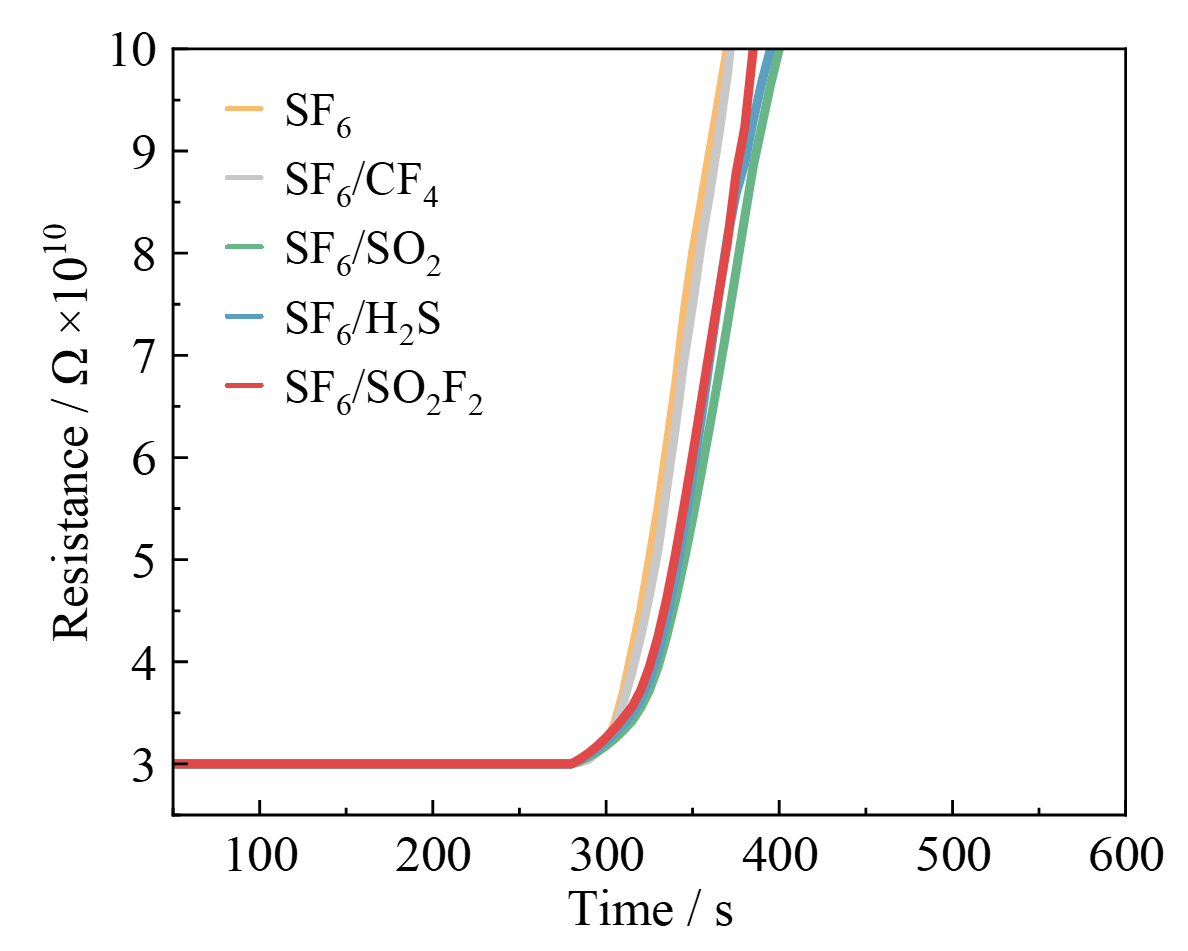


**Figure S1.** Gas sensing response of intrinsic Zr-MOF-808.


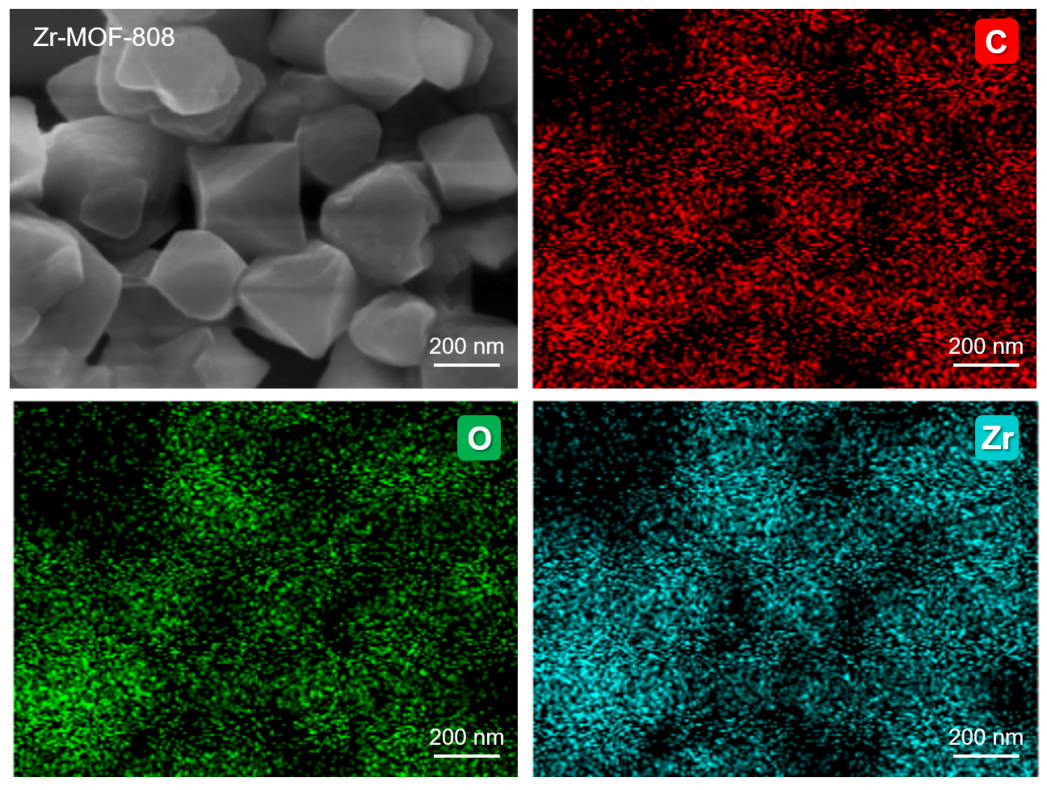


**Figure S2.** SEM image and corresponding elemental mapping of Zr-MOF-808.


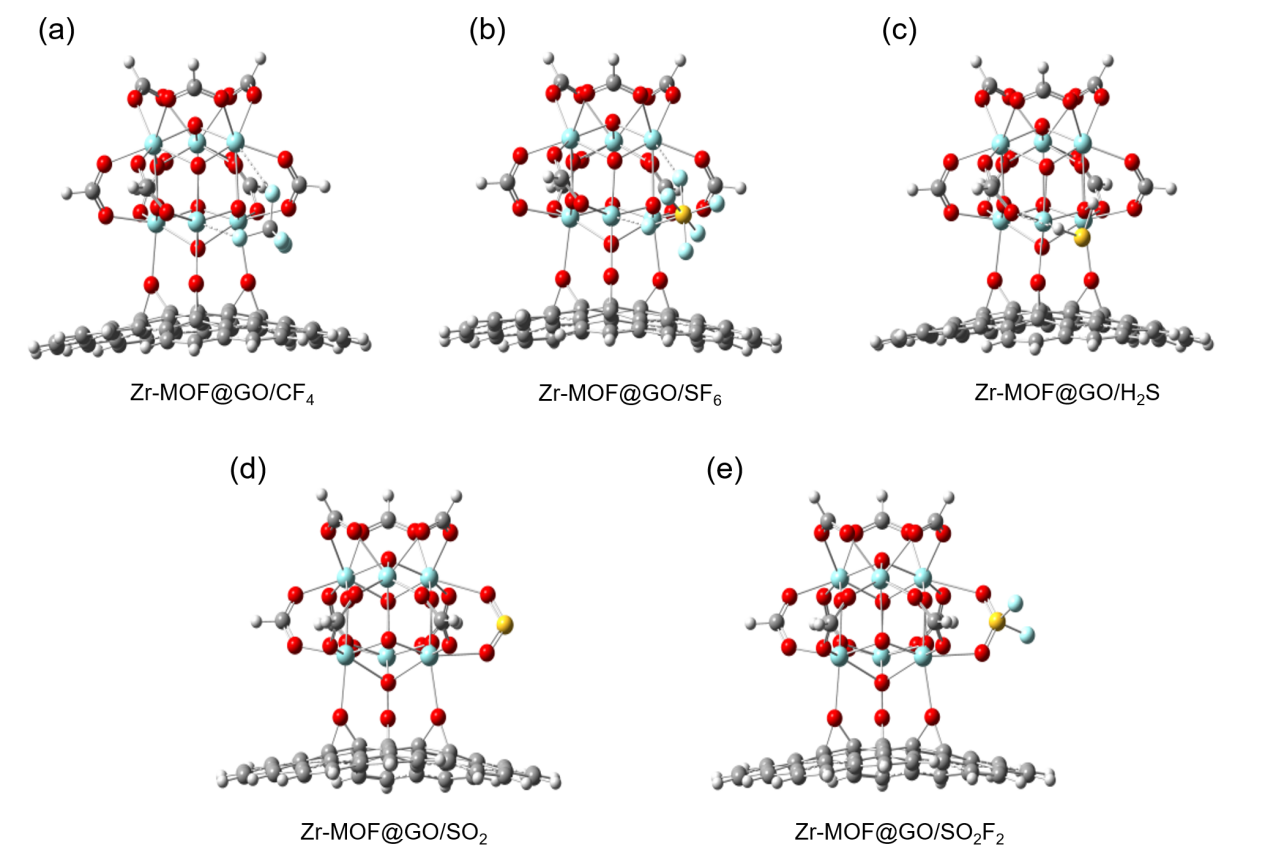


**Figure S3.** The composite molecular models of Zr-MOF@GO-808 after adsorbing various gases.


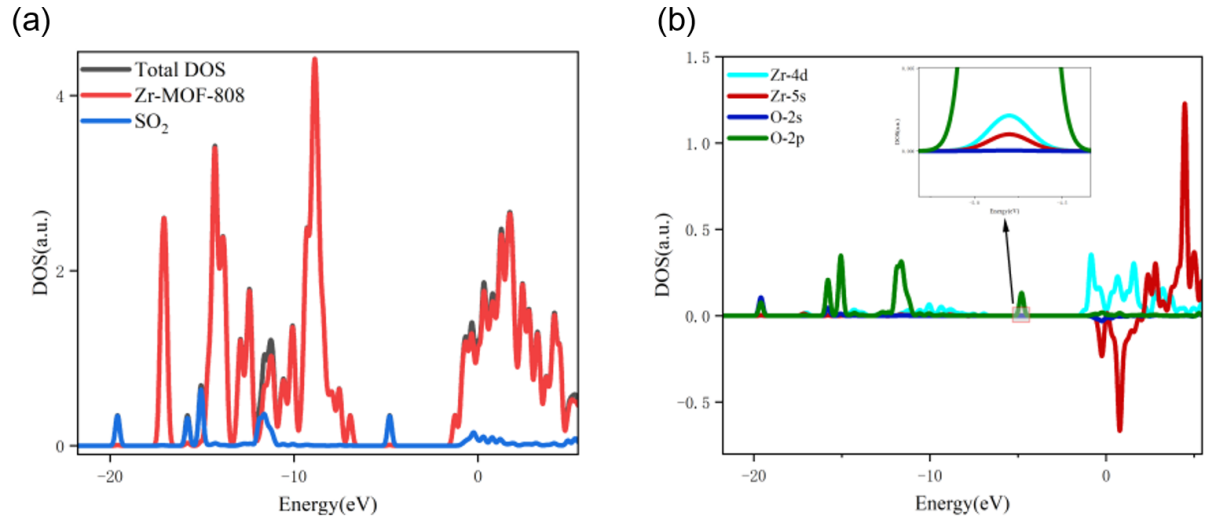


**Figure S4.** Density of states of Zr-MOF-808 and SO2.


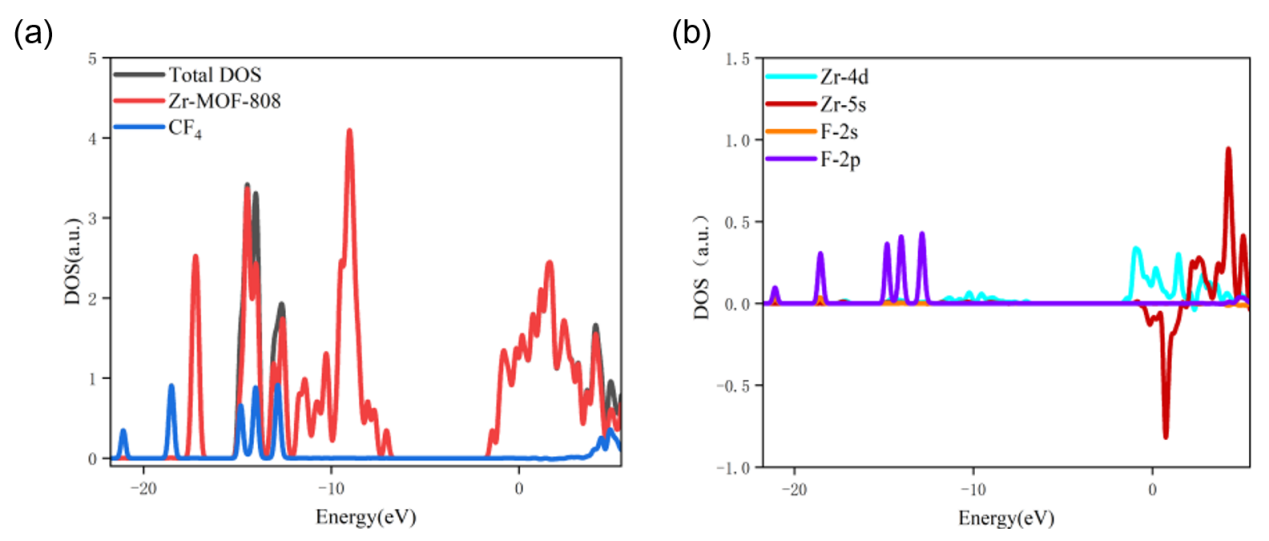


**Figure S5.** Density of states of Zr-MOF-808 and CF4.


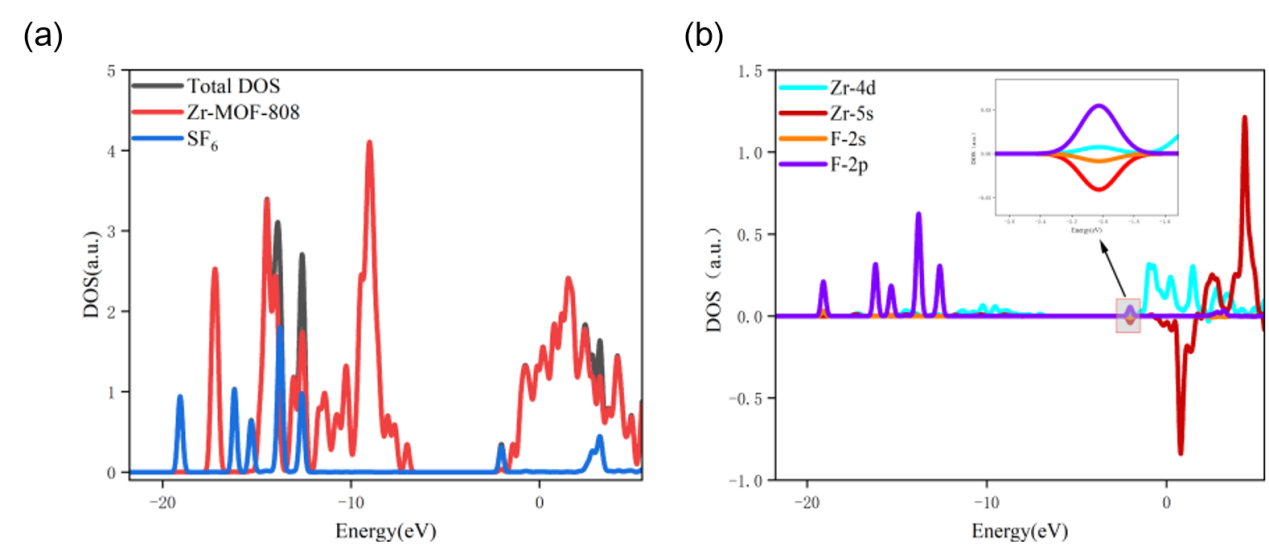


**Figure S6.** Density of states of Zr-MOF-808 and SF6.


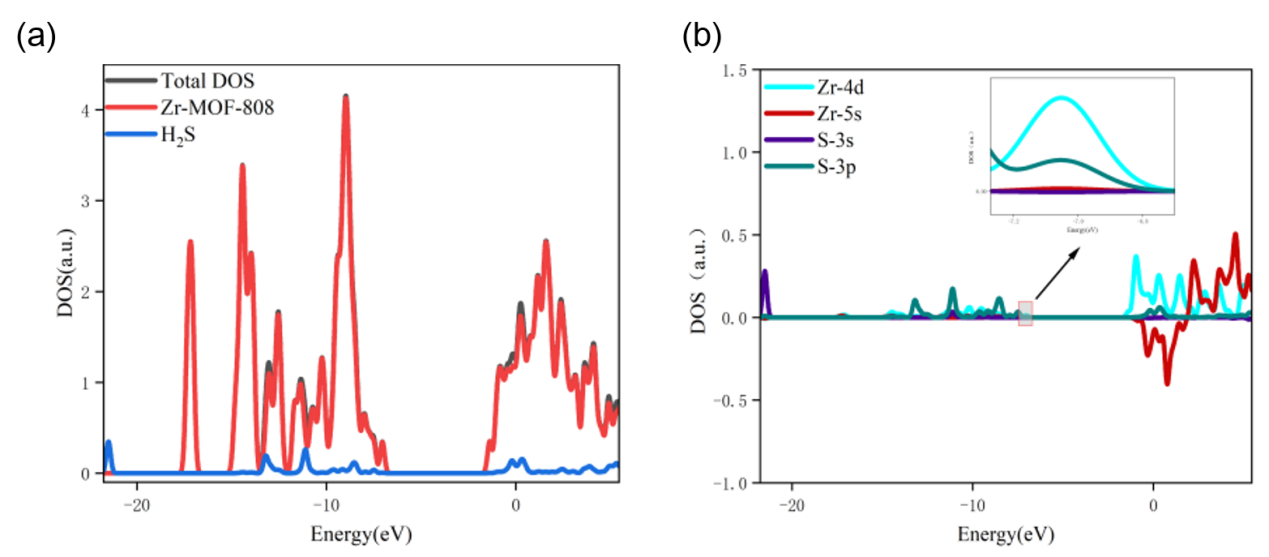


**Figure S7.** Density of states of Zr-MOF-808 and H2S.


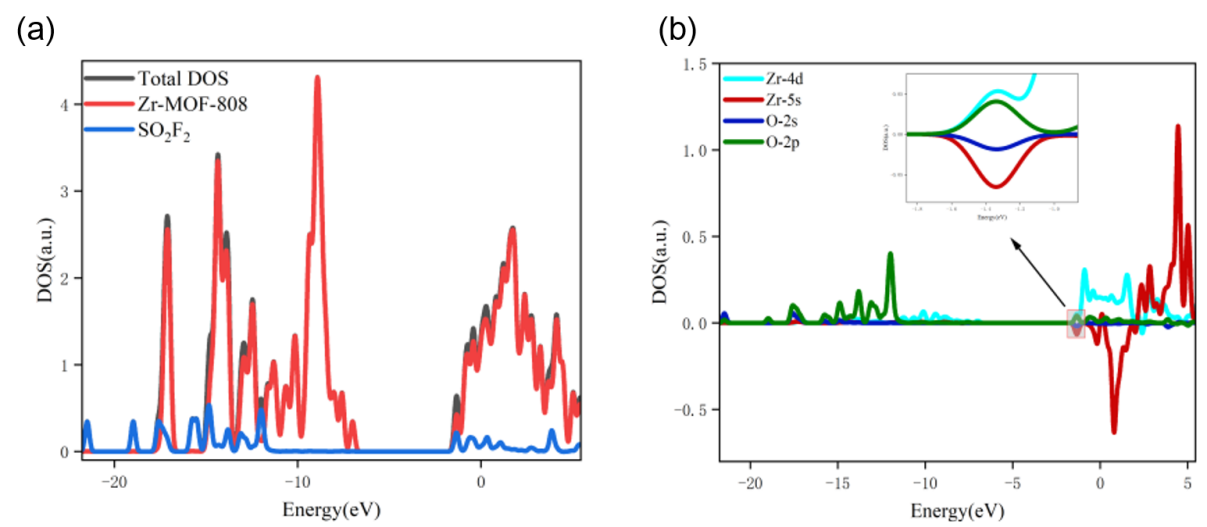


**Figure S8.** Density of states of Zr-MOF-808 and SO2F2.
